# Supplementary material for: Offline catalytic behavior in the preparation of FDCA from biomass and CO 2
Source: Royal Society of Chemistry journal article supplement (doi:10.1039/d5cc06765k), 2026-01-01
Supplement: d5cc06765k1.pdf [file d5cc06765k1.pdf]

**Supplementary Material**

For

**Off-line catalytic behavior in the preparation of FDCA from  
biomass and CO<sub>2</sub>**

Xu Wu <sup>a</sup>, Heqin Guo <sup>a\*</sup>, Litao Jia <sup>a</sup>, Debao Li <sup>a\*</sup>

<sup>a</sup> *State Key Laboratory of Coal Conversion, Institute of Coal Chemistry, Chinese Academy of  
Sciences, Taiyuan, Shanxi 030001, People's Republic of China*

---

\* Corresponding author. E-mail address: [guoheqin@sxicc.ac.cn](mailto:guoheqin@sxicc.ac.cn) (H. Q. Guo); [dbli@sxicc.ac.cn](mailto:dbli@sxicc.ac.cn) (D. B. Li)

## 9 1. Experimental part

10 Manganese sulfate monohydrate ( $\text{MnSO}_4 \cdot \text{H}_2\text{O}$ ), potassium permanganate  
11 ( $\text{KMnO}_4$ ), cesium carbonate ( $\text{Cs}_2\text{CO}_3$ ), iron(III) hydroxide, furfural, and furoic acid  
12 were purchased from MACKLIN and employed in catalyst synthesis.

### 13 1.1.1 Preparation of $\delta\text{-MnO}_2$

14  $\delta\text{-MnO}_2$  was synthesized hydrothermally by adding  $\text{KMnO}_4$  (0.024 mol) and  
15  $\text{MnSO}_4 \cdot \text{H}_2\text{O}$  (0.004 mol) to deionized water (140 mL) under stirring for 30 min. The  
16 homogeneous solution was transferred to a 200 mL polytetrafluoroethylene-lined  
17 autoclave and maintained at 160 °C for 12 h. After cooling to room temperature, the  
18 precipitate was collected by filtration, washed thoroughly with deionized water, and  
19 dried at 80 °C for 12 h. The resulting material was designated as  $\delta\text{-MnO}_2$ .

### 20 1.1.2 Preparation of FeFDCA

21 2 mmol of FDCA was mixed with 0.67 mmol of  $\text{Fe}(\text{OH})_3$ , followed by the addition  
22 of 2 mL of deionized water. The mixture was magnetically stirred for 30 min. The  
23 completion of the acid-base reaction was determined by monitoring the pH value of the  
24 solution. Once the pH value stabilized at approximately 6, the resulting mixture was  
25 transferred to an oven and dried at 120 °C for 2 h to completely remove the residual  
26 water. The resulting powder was identified as FeFDCA.

## 27 1.2 Evaluation of the catalyst

### 28 1.2.1 Furfural oxidation to furfuryl acid

29 Catalyst evaluation was performed in a 100 mL batch autoclave reactor. In a  
30 standard procedure, furfural (50 mg), deionized water (10 mL), and catalyst (200 mg)

31 were charged into the reactor. The system was purged with pure O<sub>2</sub> (5×) and pressurized  
 32 to 1 MPa with O<sub>2</sub>. Reactions were conducted at 100 °C for 1 h with continuous stirring  
 33 (500 rpm). Parametric studies examining variable effects are detailed in subsequent  
 34 sections. Following reaction completion, the reactor was rapidly cooled to ambient  
 35 temperature. The product mixture was filtered through a 22 μm PTFE membrane  
 36 syringe filter, diluted appropriately, and analyzed by high-performance liquid  
 37 chromatography (HPLC) under these conditions: the column was a C<sub>18</sub> column from  
 38 Waters, the flow ratio was acetonitrile:water=1:1, the flow rate was 1 ml/min, the  
 39 detection wavelength was 220 nm, and the column temperature was constant at 30 ° C.  
 40 The reaction was carried out at a constant temperature of 30 ° C. The reaction was  
 41 carried out at a constant temperature of 30 °C. The carbon equilibrium of the reaction  
 42 was calculated by using the configured standard solution.

43 The formulae for furfural conversion, furfuryl acid selectivity, reaction rate and  
 44 carbon balance of the furfural oxidation-to-acid reaction in this study were as follows:

$$45 \quad \text{Conver.FF} = \frac{n_{\text{FF in}} - n_{\text{FFout}}(\text{by HPLC})}{n_{\text{FF in}}} \times 100\%$$

$$46 \quad \text{Select.FA} = \frac{n_{\text{FA}}(\text{by HPLC})}{n_{\text{product}}(\text{by HPLC})} \times 100\%$$

$$47 \quad \text{Reaction rate} = \frac{n_{\text{FF in}} \times \text{Conver.FF} \times \text{Select.FA}}{m_{\text{cat.}} \times t} \times 100\%$$

$$48 \quad \text{Carbon balance} = \frac{n_{\text{FF out}} \times n_{\text{FA out}}}{n_{\text{FF in}}} \times 100\%$$

49 where Conver.FF denotes furfural conversion, Select.FA denotes furfuryl acid  
 50 selectivity; n<sub>FF in</sub> denotes the feed molar amount of furfural, n<sub>FF out</sub> denotes the molar  
 51 amount of furfural in the product detected by HPLC; n<sub>FA</sub> denotes the molar amount of

52 furfuryl acid in the product detected by HPLC,  $n_{\text{product}}$  denotes the total molar amount  
53 of the product detected by HPLC;  $m_{\text{cat.}}$  denotes the total mass of catalyst and  $t$  denotes  
54 the reaction time.

### 55 1.2.2 Evaluation of direct carboxylation performance of furoic acid/furoate with 56 $\text{CO}_2$

57 A mixture of furoic acid (2 mmol) and hydroxide (1 mmol) in deionized water (2  
58 mL) was magnetically stirred for 5 min. Cesium carbonate ( $\text{Cs}_2\text{CO}_3$ , 1.2 mmol) was  
59 subsequently added, followed by magnetic stirring for 15 min. The resulting mixture  
60 was dehydrated at  $150^\circ\text{C}$  for 2 h. The dried powder was transferred to a 100 mL batch  
61 reactor with magnetic stirring. The system was purged with  $\text{CO}_2$  (5 $\times$ ), pressurized to 2  
62 MPa, and heated to  $230^\circ\text{C}$ . The reaction proceeded for 12 h at 300 rpm.

63 Control experiment: Furoic acid was directly mixed with  $\text{Cs}_2\text{CO}_3$  in deionized  
64 water (2 mL), stirred for 20 min, dried, and reacted under identical conditions.

65 The above reaction products were analyzed in the following two ways:

66 High Performance Liquid Chromatography (HPLC): the above obtained solid was  
67 dissolved in the mobile phase and filtered using a  $0.2\ \mu\text{m}$  PTFE filter membrane and  
68 then the above filtrate was analyzed by HPLC. The chromatographic detection  
69 conditions were as follows: the chromatographic column was a Waters  $\text{C}_{18}$  column, the  
70 mobile phase ratio was acetonitrile: water = 1:9, the flow rate was 1 mL/min, the  
71 detection wavelength was 254 nm, and the column temperature was constant at  $40^\circ\text{C}$ .  
72 The chromatographic detection conditions were as follows.

73 The conversion of furoic acid in this study, the FDCA selectivity was calculated

74 as follows:

$$\text{Conver.FA} = \frac{n_{\text{product}}(\text{by HPLC})}{n_{\text{product}}(\text{by HPLC}) + n_{\text{FA out}}(\text{by HPLC})} \times 100\%$$

$$\text{Select.FDCA} = \frac{n_{\text{FDCA}}(\text{by HPLC})}{n_{\text{product}}(\text{by HPLC})} \times 100\%$$

77 Where Conver.FA denotes the conversion of furoic acid, Select.FDCA denotes the  
78 selectivity of FDCA, n<sub>product</sub> (HPLC) denotes the total molar amount of the product  
79 detected by HPLC, n<sub>FA out</sub> denotes the molar amount of unreacted furfural detected by  
80 HPLC, and n<sub>FDCA</sub> denotes the molar amount of furandicarboxylic acid in the product  
81 detected by HPLC.

### 82 1.3 Catalyst characterization

83 XRD: The crystalline phase and growth direction of the samples were  
84 characterized using an X-ray diffraction (XRD) analyzer (PANalytical X'pert3) with  
85 Cu target, K $\alpha$ ( $\lambda = 1.54056 \text{ \AA}$ ), 40 kV tube voltage and 40 mA tube current as the  
86 parameters tested.

87 SEM: Scanning electron microscope (JSM-7001F) was utilized to observe the  
88 morphology of the samples.

89 Furfural-IR: Furfural-IR experiments were performed on a Nicolet iS10 infrared  
90 spectrometer. The catalyst was first purged under argon atmosphere at 80°C for 30 min  
91 and sample spectra were collected. The furfural was then bubbled with argon gas into  
92 the in situ cell until the catalyst was saturated with adsorption. After the catalyst is  
93 saturated with adsorption, argon gas is switched to remove the physically adsorbed  
94 furfural for 30 min, and finally oxygen or argon is switched to start the oxidation

95 reaction for 30 min.

96 FA-DRIFTS: The in situ infrared experiments of furoate were carried out on a  
97 Nicolet iS10 infrared spectrometer with the following procedure: a mixture of  
98 appropriate amount of furoate and carbonate (mixing ratio of furoate: carbonate = 1:1.2,  
99 mixed and fully ground) was placed in a reaction cell, and the temperature was raised  
100 from room temperature to 120 °C at a rate of 10 °C/min in an Ar gas atmosphere, and  
101 held for 60 min. The water was removed in 60 min. The temperature was then raised from  
102 120 °C to 230 °C, and the gas was switched from nitrogen to CO<sub>2</sub> to allow the  
103 carboxylation reaction to occur, and the time-dependent infrared spectral changes were  
104 recorded over a period of 30 min.

105 In order to clarify the reaction mechanism of carboxylation, the in situ IR of  
106 furfurylates was carried out in Ar gas atmosphere, and the specific experimental  
107 procedure was as follows. A mixture of appropriate amount of furoate and carbonate  
108 (mixing ratio of furoate: carbonate = 1:1.2, mixed and ground thoroughly) was placed  
109 in a reaction cell, and the temperature was increased from room temperature to 120 °C  
110 at a rate of 10 °C/min in Ar gas atmosphere, and kept for 60 min to remove water. The  
111 temperature was then raised from 120 °C to 230 °C in an Ar gas atmosphere to allow  
112 carboxylation to take place, and the time-dependent changes in the IR spectra were  
113 recorded over a period of 30 min.

114

115 **2. The characterization results.**

116 **Fig. s1.** SEM image of  $\delta$ -MnO<sub>2</sub>.

117 **Fig. s2.** XRD pattern of  $\delta$ -MnO<sub>2</sub>.

118 **Fig. s3.** Carboxylation properties of ferric furoate in different atmospheres.

119 **Fig. s4.** In situ <sup>1</sup>H NMR spectra of furoic acid (left) and iron furoate (right) dissolved  
120 in CD<sub>3</sub>CN after the addition of D<sub>2</sub>O.

121 **Fig. s5.** (a) O<sub>2</sub>-TPD profiles of  $\delta$ -MnO<sub>2</sub>, (b) Water signaling in the O<sub>2</sub>-TPD process.

122

123

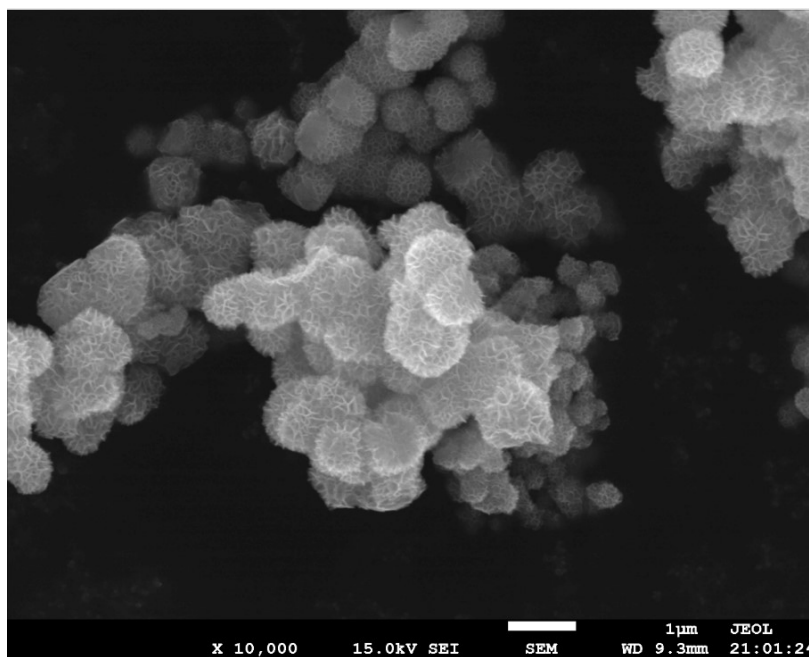

**Fig. s1.** SEM image of  $\delta$ -MnO<sub>2</sub>.



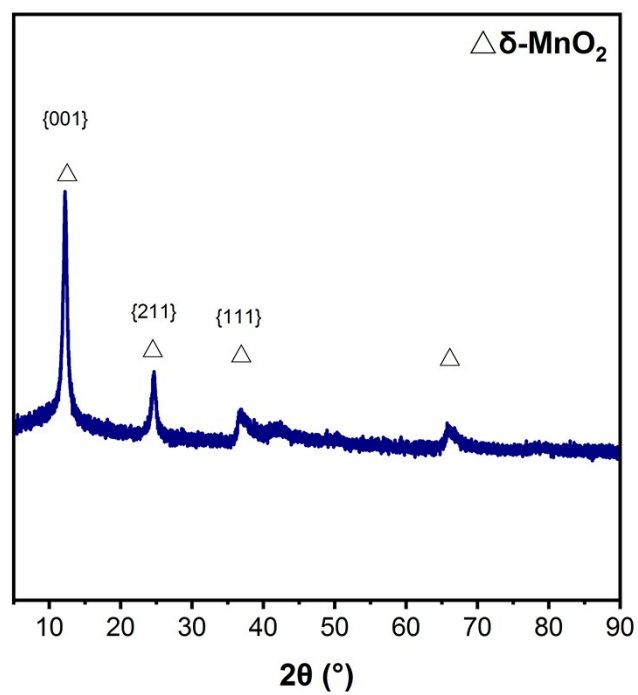

**Fig. s2.** XRD pattern of  $\delta\text{-MnO}_2$ .

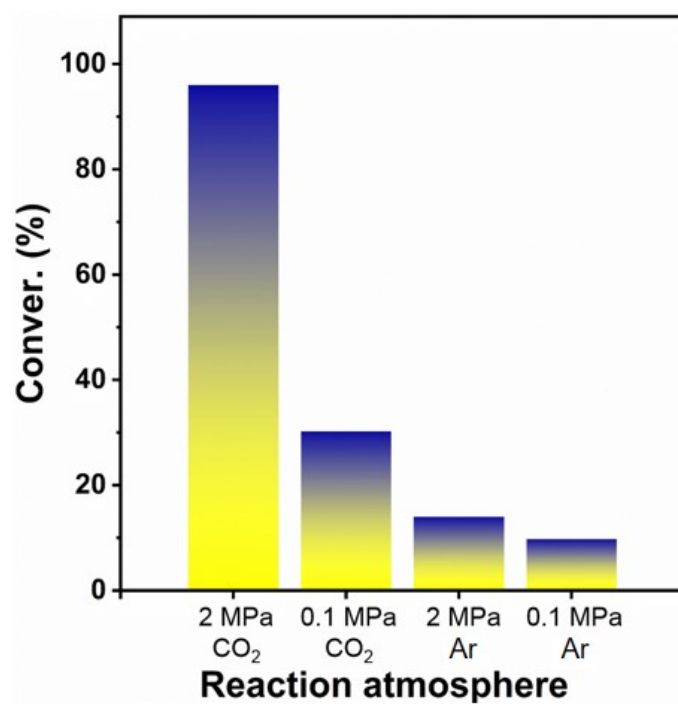

**Fig. s3.** Carboxylation properties of ferric furoate in different atmospheres.

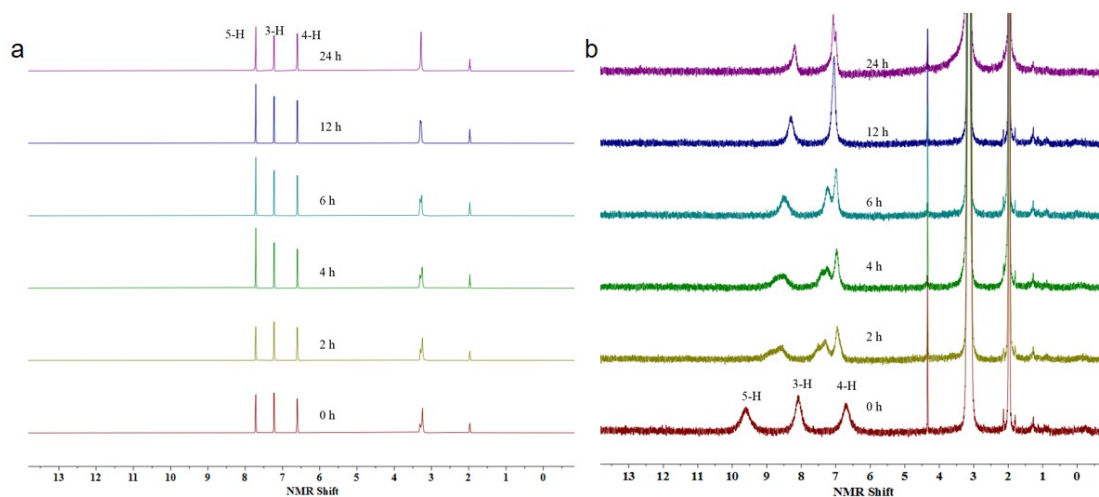

131

132 Fig. S4. In situ  $^1\text{H}$  NMR spectra of furoic acid (left) and iron furoate (right) dissolved in  $\text{CD}_3\text{CN}$

133

after the addition of  $\text{D}_2\text{O}$ .

134

In-situ liquid-state NMR spectroscopy unambiguously demonstrates that the

135 introduction of Fe facilitates the deprotonation of the 5-H on the furan ring, thereby

136 promoting the insertion of  $\text{CO}_2$  and consequently favoring the formation of 2,5-

137 furandicarboxylic acid (FDCA).

138

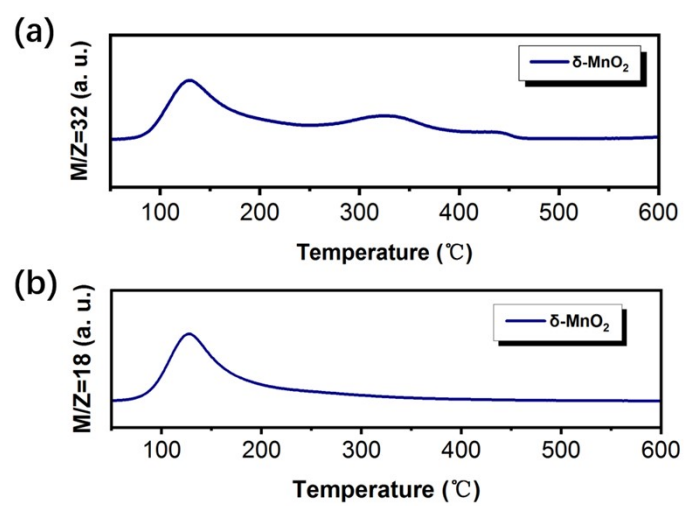

139 Fig. s5. (a)  $\text{O}_2$ -TPD profiles of  $\delta\text{-MnO}_2$ , (b) Water signaling in the  $\text{O}_2$ -TPD process.
